# Supplementary material
Source: Springer Nature journal article supplement (https://www.springermedizin.de/resource/supplementary/12906_2008_224_MOESM3_ESM.pdf/9524312)
Supplement: MOESM3 [file 9524312]

## General unspecified dislike

- a. *'I just don't like the idea of a suppository'*
- b. *'I'd prefer to avoid altogether any form of alternative therapy'*
- c. *'I just don't fancy it' (reference to hypnotherapy)*
- d. *'It's just not my style' (reference to both acupuncture and homeopathy)*
- e. *'I don't think this would work, I just don't' (reference to acupuncture)*
- f. *'I prefer to refrain from medication where possible'.*
- g. *'I do not like taking medication, my doctor found it hard trying to get me to take medication for my duodenal ulcer'*
- h. *I would not like to depend on drugs'*

## Prefer an alternative first

- i. *'I would not want to take a medication before other treatments have been tried'*
- j. *'I'd prefer dietary or alternative methods to chemical'*

## Side effects

- k. *'frightened it may make me worse' (referring to tablets)*
- l. *'My symptoms are not bad enough to warrant this and might have other side effects'*
- m. *'Although I eat well with a varied diet I do not wish to loose weight, which would happen if I reduced dairy products'*

## Specific reasons

- n. *'No alternative therapies where there is a spiritual root'*
- o. *'I can't stand being too hot so I think it would get uncomfortable'.*
- p. *'I would find this physically distressing,' 'I don't like anyone messing with my bum, not even me.'* (Referring to suppositories)
- q. *'Stomach already big enough'.*
- r. *This might restrict movement and exercise, also may not be viable with work requirements'*
- s. *'I don't like the fact that your mind goes blank',*
- t. *'I do not like the thought of not being in control',*
- u. *'Too many questionable aspects to hypnotherapy',*
- v. *'What happens if hypnotherapy goes wrong?'*
- w. *'I haven't got the will or the energy'.*
